# Supplementary material
Source: Springer Nature journal article supplement (https://www.springermedizin.de/resource/supplementary/12913_2008_957_MOESM3_ESM.pdf/9536550)
Supplement: MOESM3 [file 9536550]

10,626 articles identified from databases  
6,437 in PubMed  
2,513 in EMBASE  
1,238 in CINAHL  
438 in NHS EED

26 articles identified in  
reference lists or by  
colleagues

131 duplicate articles eliminated

10,495 unique articles identified

10,302 citations excluded based on screening of titles and abstracts

- Intervention does not include a financial incentive for return of health care service
- No quantitative data
- Review studies
- Editorials or commentaries
- News or policy briefs

219 potentially relevant articles identified for further review

176 articles excluded after full-text review

- Intervention does not include a financial incentive for return of health care service
- Program tries to increase the number of health workers in underserved areas primarily through non-financial means
- Financial incentive is intended to increase the supply of health workers in the military, in research, or in specific residency programs
- No quantitative data
- Review studies
- Studies investigating the attractiveness of hypothetical financial-incentive programs
- Editorials or commentaries
- News or policy briefs

43 articles included in final review
